# Supplementary material for: De Novo Transcriptome of the Flagellate Isochrysis galbana Identifies Genes Involved in the Metabolism of Antiproliferative Metabolites
Source: MDPI journal article supplement (doi:10.3390/biology11050771), 2022-05-18
Supplement: s1 [file s1]

**Table S1.** *Isochrysis galbana* transcriptome assembly statistics

|                              |          |
|------------------------------|----------|
| # contigs ( $\geq 0$ bp)     | 107616   |
| # contigs ( $\geq 1000$ bp)  | 33095    |
| # contigs ( $\geq 5000$ bp)  | 837      |
| # contigs ( $\geq 10000$ bp) | 79       |
| # contigs ( $\geq 25000$ bp) | 3        |
| # contigs ( $\geq 50000$ bp) | 0        |
| Largest contig               | 33195    |
| Total length                 | 80409305 |
| GC (%)                       | 64.09    |
| N50                          | 2003     |
| N75                          | 1309     |
| L50                          | 13066    |
| L75                          | 25443    |
