# Supplementary material for: De Novo Transcriptome of the Flagellate Isochrysis galbana Identifies Genes Involved in the Metabolism of Antiproliferative Metabolites
Source: MDPI journal article supplement (doi:10.3390/biology11050771), 2022-05-18

**Figure S1.** Graphical representation of the results of the BUSCO analysis using the Eukaryote databases. C=complete; S=single copy; D=duplicated; F=fragmented; M=missing.

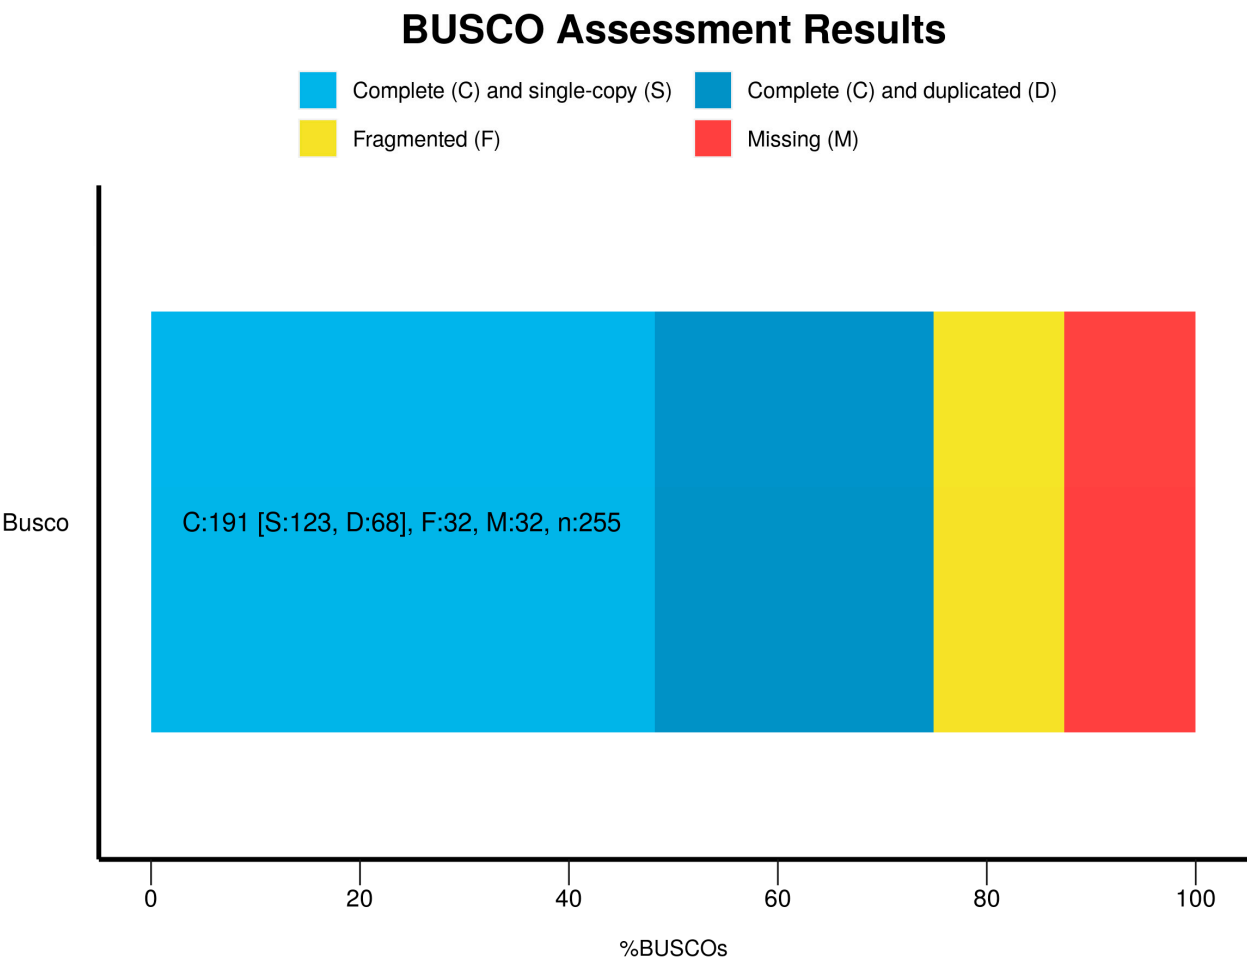

Supplement: s1 [file s1]
